# Supplementary material for: Factors influencing skilled birth attendant utilization among teenage mothers in Lira District, Northern Uganda: a cross-sectional study
Source: Research Square preprint supplement (doi:10.21203/rs.3.rs-8353863/v1), 2025-12-16
Supplement: Supplementary file 1 [file 21f4b327d48ac69e761aaef7.docx]

**Table S1** Bivariate analysis for associations between the teenage mother’s socio-demographic factors and the utilization of Skilled Birth Attendants

| **Variable** | **Utilization** | | | |
| --- | --- | --- | --- | --- |
|  | **No** | **Yes** | **COR (95%CI)** | **p-value** |
| **Current age (in years)** | 17.9 (0.934) | 17.9 (0.924) | 17.943 (0.927) | 0.598 |
| **Age category in years** |  |  |  |  |
| 13-17 | 51 (37.8%) | 62 (34.3%) | 1.00 |  |
| 18-19 | 84 (62.2%) | 119 (65.7%) | 1.17 (0.73-1.85) | 0.518 |
| **Marital status** |  |  |  |  |
| Married | 57 (42.2%) | 107 (59.1%) | 1.00 |  |
| Single | 72 (53.3%) | 67 (37.0%) | 0.40 (0.31-0.79) | **0.003*** |
| Divorced | 6 (4.4%) | 7 (3.9%) | 0.62(0.20-1.93) | 0.413 |
| **Highest level of education completed** |  |  |  |  |
| None | 25 (18.5%) | 23 (12.7%) | 1.00 |  |
| Primary | 90 (66.7%) | 117 (64.6%) | 1.41(0.75-2.65) | 0.282 |
| Secondary | 15 (11.1%) | 36 (19.9%) | 2.60 (1.14-5.96) | **0.023*** |
| Tertiary | 5 (3.7%) | 5 (2.8%) | 1.09(0.28-4.25) | 0.905 |
| **Current employment status** |  |  |  |  |
| Housewife | 45 (33.3%) | 62 (34.3%) | 1.00 |  |
| Peasant | 85 (63.0%) | 112 (61.9%) | 0.96 0.59-1.53) | 0.854 |
| Others | 5 (3.7%) | 7 (3.9%) | 1.02 (0.30-3.40) | 0.979 |
| **Religious affiliation** |  |  |  |  |
| Anglican | 55 (40.7%) | 88 (48.6%) | 1.00 |  |
| Catholics | 47 (34.8%) | 50 (27.6%) | 0.66 (0.39-1.12) | 0.125 |
| Muslim | 27 (20.0%) | 26 (14.4%) | 0.60(0.32-1.14) | 0.117 |
| Pentecostals | 6 (4.4%) | 17 (9.4%) | 1.77 (0.66-4.76) | 0.238 |

**: Variable significant at 5%; COR=Crude odds ratio; CI: Confidence interval*
