# Supplementary material for: Factors influencing skilled birth attendant utilization among teenage mothers in Lira District, Northern Uganda: a cross-sectional study
Source: Research Square preprint supplement (doi:10.21203/rs.3.rs-8353863/v1), 2025-12-16
Supplement: Supplementary file 2 [file 3eaa2c60866c3380b6ad276a.docx]

**Table S4** Bivariate analysis for associations between economic factors and utilization of Skilled Birth Attendants among the teenage mothers

| **Variable** | **Utilization** | | | |
| --- | --- | --- | --- | --- |
|  | **No** | **Yes** | **COR (95%CI)** | **P-Value** |
| **Economic situation of your family influences your decision** |  |  |  |  |
| Yes | 62 (45.9%) | 98 (54.1%) | 1.00 |  |
| No | 73 (54.1%) | 83 (45.9%) | 0.72 (0.46-1.12) | 0.149 |
| **Cost of transport (UGX)** |  |  |  |  |
| ≤ 5000 | 69 (76.7%) | 107 (68.6%) | 1.00 |  |
| Above 5000 | 21 (23.3%) | 49 (31.4%) | 1.50 (0.83-2.73) | 0.178 |
| **Pay out-of-pocket expenses for childbirth** |  |  |  |  |
| Yes | 52 (38.5%) | 40 (22.2%) | 1.00 |  |
| No | 83 (61.5%) | 140 (77.8%) | 2.19(1.24-3.59) | **0.002*** |
| **Face any challenges related to the affordability of healthcare services** |  |  |  |  |
| Yes | 56 (41.5%) | 71 (39.4%) | 1.00 |  |
| No | 79 (58.5%) | 109 (60.6%) | 1.09 (0.69-1.71) | 0.715 |
| **Receive any support from government programs/NGOs** |  |  |  |  |
| Yes | 61 (45.2%) | 99 (55.6%) | 1.00 |  |
| No | 74 (54.8%) | 79 (44.4%) | 0.66(0.42-1.03) | **0.068*** |
| **Person who controls finances especially during pregnancy** |  |  |  |  |
| Pregnant mother themselves | 93 (71.0%) | 110 (60.8%) | 1.00 |  |
| Husband | 18 (13.7%) | 40 (22.1%) | 1.88(1.01-3.50) | **0.047*** |
| Mother or father-in-law | 20 (15.3%) | 31 (17.1%) | 1.31(0.70-2.45) | 0.397 |

**: Variable significant at 5%; COR=Crude odds ratio; CI: Confidence interval*
