# Supplementary material for: Factors influencing skilled birth attendant utilization among teenage mothers in Lira District, Northern Uganda: a cross-sectional study
Source: Research Square preprint supplement (doi:10.21203/rs.3.rs-8353863/v1), 2025-12-16
Supplement: Supplementary file 3 [file 4335bd17d118eda8a7fdff05.docx]

**Table S3** Bivariate analysis for associations between cultural factors and utilization of Skilled Birth Attendants among the teenage mothers

| **Variable** | **Utilization** | | | |
| --- | --- | --- | --- | --- |
|  | **No** | **Yes** | **COR (95%CI)** | **p-value** |
| **Specific cultural practices or rituals observed during pregnancy** |  |  |  |  |
| Yes | 64 (50.0%) | 89 (49.2%) | 1.00 |  |
| No | 64 (50.0%) | 92 (50.8%) | 1.03(0.66-1.63) | 0.886 |
| **Cultural beliefs influenced your decision regarding delivery** |  |  |  |  |
| Yes | 36 (27.7%) | 30 (16.9%) | 1.00 |  |
| No | 94 (72.3%) | 147 (83.1%) | 1.88 (1.08-3.25) | 0.25 |
| **Not recommended culturally to prepare for a baby's delivery early** |  |  |  |  |
| Yes | 109 (80.7%) | 133 (73.5%) | 1.00 |  |
| No | 26 (19.3%) | 48 (26.5%) | 1.51(0.88-2.60) | 0.133 |
| **Traditional Birth Attendant (TBAs) operating within the community** |  |  |  |  |
| Yes | 116 (85.9%) | 105 (58.0%) | 1.00 |  |
| No | 19 (14.1%) | 76 (42.0%) | 4.42(2.50-7.80) | **<0.001*** |
| **Influence by TBAs in making decisions on baby’s delivery** |  |  |  |  |
| Moderately influential | 23 (17.0%) | 36 (19.9%) | 1.00 |  |
| Slightly influential | 53 (39.3%) | 51 (28.2%) | 0.61 (0.32-1.18) | 0.142 |
| Not influential at all | 59 (43.7%) | 94 (51.9%) | 1.02(0.55-1.89) | 0.955 |
| **Person plays a significant role in influencing your decision regarding utilizing of TBA** |  |  |  |  |
| Community Elder | 54 (40.0%) | 51 (28.2%) | 1.00 |  |
| Family members | 11 (8.1%) | 52 (28.7%) | 5.01(2.35-10.65) | **<0.001*** |
| My Husband | 44 (32.6%) | 50 (27.6%) | 1.20 (0.69-2.10) | 0.515 |
| Pregnant women themselves | 26 (19.3%) | 28 (15.5%) | 1.14(0.59-2.20) | 0.695 |
| **Ever delivered by a TBA or health facility** |  |  |  |  |
| TBAs / Home | 40 (29.6%) | 135 (43.0%) | 1.00 |  |
| Health facility | 95 (70.4%) | 181 (57.0%) | 1.64 (0.98-2.74) | **<0.020*** |
| **Experienced negative judgment about her teenage pregnancy from the community members** |  |  |  |  |
| Yes | 66 (50.4%) | 74 (40.9%) | 1.00 |  |
| No | 65 (49.6%) | 107 (59.1%) | 1.47(0.93-2.31) | **0.097*** |

**: Variable significant at 5%; COR=Crude odds ratio; CI: Confidence interval*
