# Supplementary material for: Factors influencing skilled birth attendant utilization among teenage mothers in Lira District, Northern Uganda: a cross-sectional study
Source: Research Square preprint supplement (doi:10.21203/rs.3.rs-8353863/v1), 2025-12-16
Supplement: Supplementary file 4 [file 47f6426c9b81fae2ccfa945d.docx]

**Table S2** Bivariate analysis for associations between health system factors and utilization of Skilled Birth Attendants among teenage mothers

| **Variables** | **Utilization** | | | |
| --- | --- | --- | --- | --- |
|  | **No** | **Yes** | **COR (95% CI)** | **p-value** |
| **Distance to the nearest healthcare facility** |  |  |  |  |
| ≤ 5 Kilometers | 65 (48.1%) | 81 (44.8%) | 1.00 |  |
| >5 Kilometers | 70 (51.9%) | 100 (55.2%) | 1.15 (0.73-1.79) | 0.549 |
| **Means of transport used to access healthcare services during pregnancy** | |  |  |  |
| Personal vehicle | 8 (5.9%) | 9 (5.0%) | 1.00 |  |
| Public transportation | 18 (13.3%) | 21 (11.6%) | 1.04 (0.33-3.25) | 0.950 |
| Walking | 95 (70.4%) | 108 (59.7%) | 1.01 (0.37-2.72) | 0.983 |
| Others(boda-boda/bicycle) | 14 (10.4%) | 43 (23.8%) | 2.73 (0.88-8.43) | 0.081 |
| **Having lack of trust on health service providers** |  |  |  |  |
| Yes | 112 (83.0%) | 164 (92.7%) | 1.00 |  |
| No | 23 (17.0%) | 13 (7.3%) | 0.39 (0.19-0.79) | **0.010*** |
| **Face any challenges in accessing healthcare services during pregnancy** | |  |  |  |
| Yes | 76 (56.3%) | 82 (45.3%) | 1.00 |  |
| No | 59 (43.7%) | 99 (54.7%) | 1.56(0.99-2.44) | 0.54 |
| **Ever experienced long waiting hours when you seeking care** | |  |  |  |
| Yes | 74 (54.8%) | 94 (51.9%) | 1.00 |  |
| No | 61 (45.2%) | 87 (48.1%) | 1.12(0.72-1.76) | 0.612 |
| **Person who delivered you at the health facility** |  |  |  |  |
| Nurses or doctor | 108(81.8%) | 176 (97.8%) | 1.00 |  |
| Attendant | 24 (18.2%) | 4 (2.2%) | 0.10 (0.03-0.30) | **<0.001*** |
| **Informed about the benefits of utilizing a skilled birth attendant** | |  |  |  |
| Yes | 100 (74.1%) | 152 (84.0%) | 1.00 |  |
| No | 35 (25.9%) | 29 (16.0%) | 0.55(0.31-0.95) | **0.032*** |
| **Think, there is adequate medicines and supplies available at facility** | |  |  |  |
| Yes | 45 (33.3%) | 70 (38.7%) | 1.00 |  |
| No | 90 (66.7%) | 111 (61.3%) | 0.79 (0.50-1.26) | 0.329 |

**: Variable significant at 5%; COR=Crude odds ratio; CI: Confidence interval*
